# Supplementary material for: A reversible fluorescent chemosensor for the rapid sensing of CN− in water: utilization of the intramolecular charge transfer blocking
Source: Royal Society of Chemistry journal article supplement (doi:10.1039/c5nj02413g), 2016-01-01
Supplement: c5nj02413g1.pdf [file c5nj02413g1.pdf]

*Electronic Supplementary Information*

**A reversible fluorescent chemosensor for the rapid sensing of CN<sup>-</sup> in water: utilization of the intramolecular charge transfer blocking**

Tai-Bao Wei,\* Yuan-Rong Zhu, Hui Li, Guo-Tao Yan, Qi Lin,  
Hong Yao and You-Ming Zhang\*

-----  
E-mail: [weitaibao@126.com](mailto:weitaibao@126.com)

E-mail: [zhangnwnu@126.com](mailto:zhangnwnu@126.com)  
-----

*Key Laboratory of Eco-Environment-Related Polymer Materials, Ministry of Education of China; Key Laboratory of Polymer Materials of Gansu Province; College of Chemistry and Chemical Engineering, Northwest Normal University, Lanzhou, Gansu, 730070. P. R. China*

-----  
\*Corresponding author

E-mail address: [weitaibao@126.com](mailto:weitaibao@126.com) (Prof. T.-B. Wei); [zhangnwnu@126.com](mailto:zhangnwnu@126.com) (Prof. Y.-M. Zhang); Tel: +086 931 7973120.

| <b>CONTENTS</b>                                                                                            | <b>PAGE</b> |
|------------------------------------------------------------------------------------------------------------|-------------|
| 1. Determination of association constant.....                                                              | 3           |
| 2. <sup>1</sup> H NMR spectra of compound ZR .....                                                         | 4           |
| 3. <sup>13</sup> C NMR spectra of compound ZR .....                                                        | 5           |
| 4. The Fluorescence Responses of ZR with anions .....                                                      | 6           |
| 5. The Fluorescence Responses of ZR to CN <sup>-</sup> with other competing anions .....                   | 7           |
| 6. A plot of fluorescence intensity Change of ZR with CN <sup>-</sup> .....                                | 8           |
| 7. Calculation of binding constant Ka .....                                                                | 9           |
| 8. Determination of Detection Limit of CN <sup>-</sup> .....                                               | 10          |
| 9. Influence of pH on ZR.....                                                                              | 11          |
| 10. The Fluorescence Intensity Changes of ZR in the Presence of CN <sup>-</sup> and Cr <sup>3+</sup> ..... | 12          |
| 11. Time-dependent Fluorescence Change of ZR with CN <sup>-</sup> .....                                    | 13          |
| 12. <sup>1</sup> H NMR spectra of ZR with addition of acid.....                                            | 14          |
| 13. IR spectra of compound ZR and ZR+CN <sup>-</sup> .....                                                 | 15          |
| 14. ESI-MS spectrum of ZR .....                                                                            | 16          |
| 15. ESI-MS spectrum of ZR+CN <sup>-</sup> complex.....                                                     | 17          |
| 16. A complementary IMP logic function .....                                                               | 18          |
| 17. Performance of ZR in the IMP gate mode.....                                                            | 19          |

## 1. Determination of association constant

The association constants ( $K_a$ ) were also determined based on the fluorescent titration curve using the equation as follows: where  $I$  and  $I_0$  represent the intensity of host in the presence and absence of ions, respectively,  $I_1$  is the saturated intensity of host in the presence of excess amount of ions;  $[A^-]$  is the concentration of ions added.

$$\frac{1}{I - I_0} = \frac{1}{I_1 - I_0} \left[ \frac{1}{K_a[A^-]} + 1 \right]$$

## 2. $^1\text{H}$ NMR spectra of compound ZR

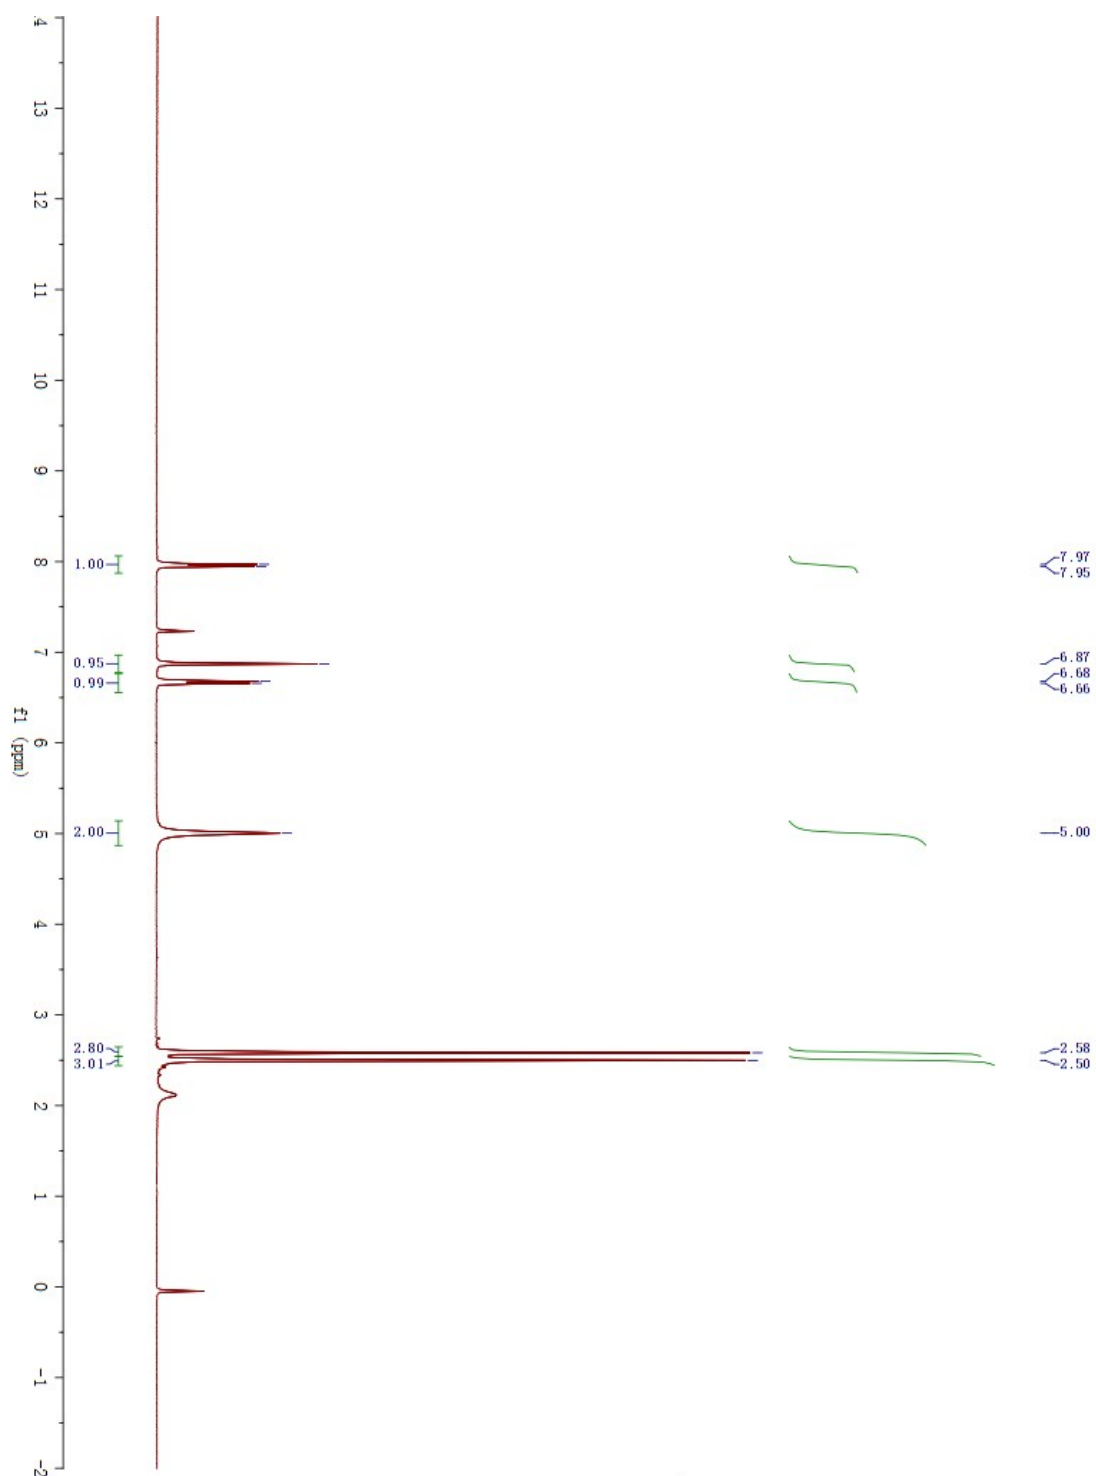

**Fig. S1**  $^1\text{H}$  NMR spectra of compound ZR.

### 3. $^{13}\text{C}$ NMR spectra of compound ZR

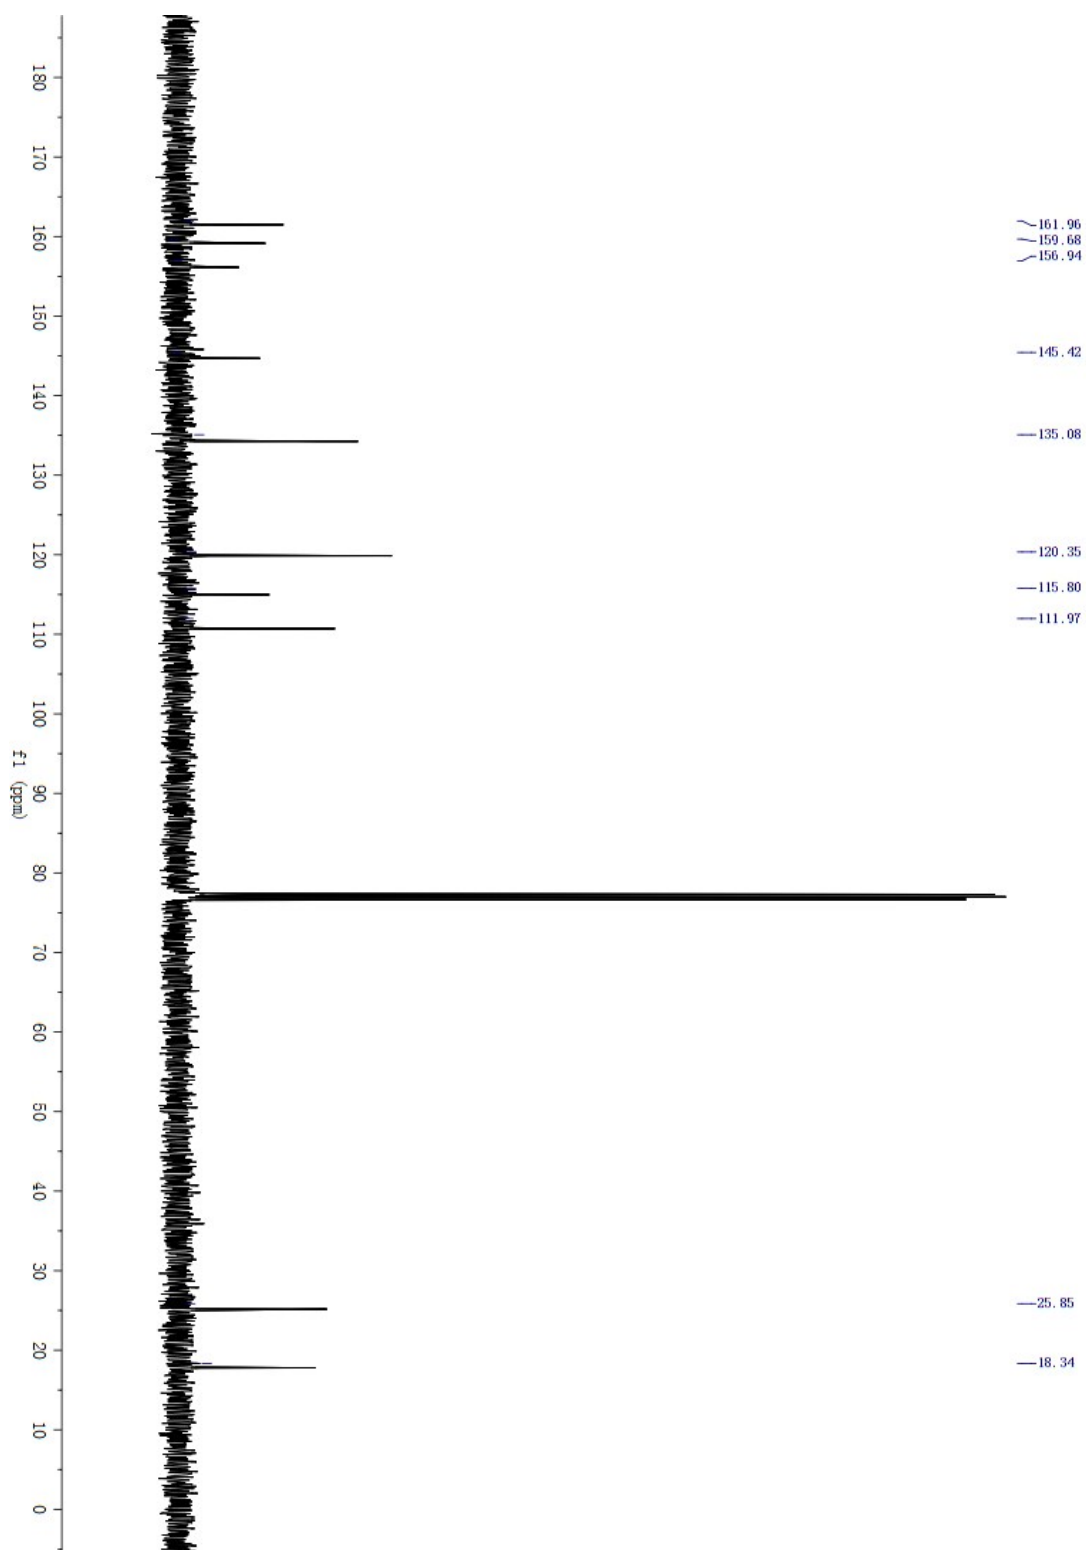

**Fig. S2**  $^{13}\text{C}$  NMR spectra of compound ZR

#### 4. The Fluorescence Responses of ZR with anions

(a)

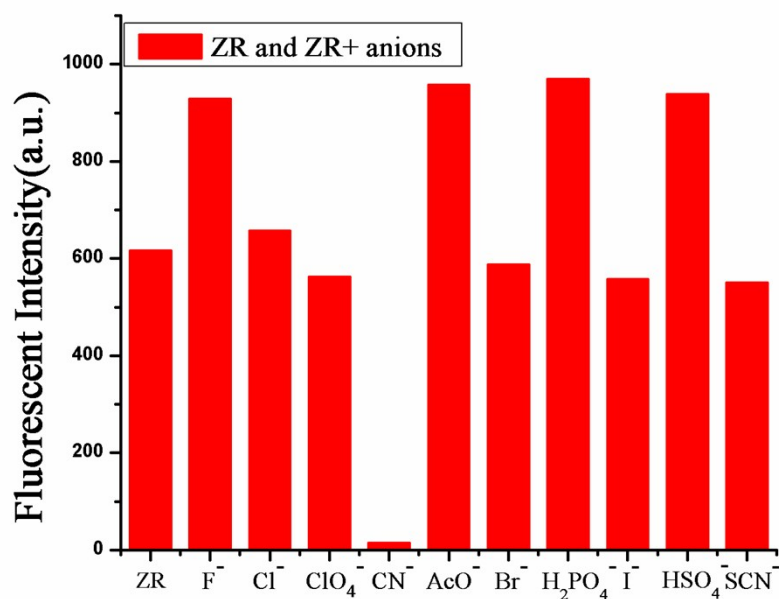

(b)

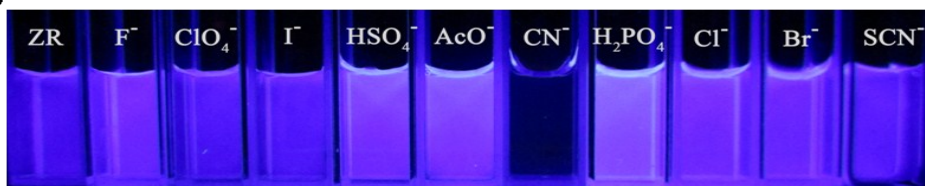

**Fig. S3** (a) Fluorescence emission data for a 1:50 mixture of **ZR** (20  $\mu$ M) and different anions in water ( $\lambda_{\text{ex}}$ =370 nm). (b) Visual fluorescence emissions of sensor **ZR** after the addition of various anions (50 equiv.) in water on excitation at 365 nm using UV lamp.

## 5. The Fluorescence Responses of ZR to $\text{CN}^-$ with other competing anions

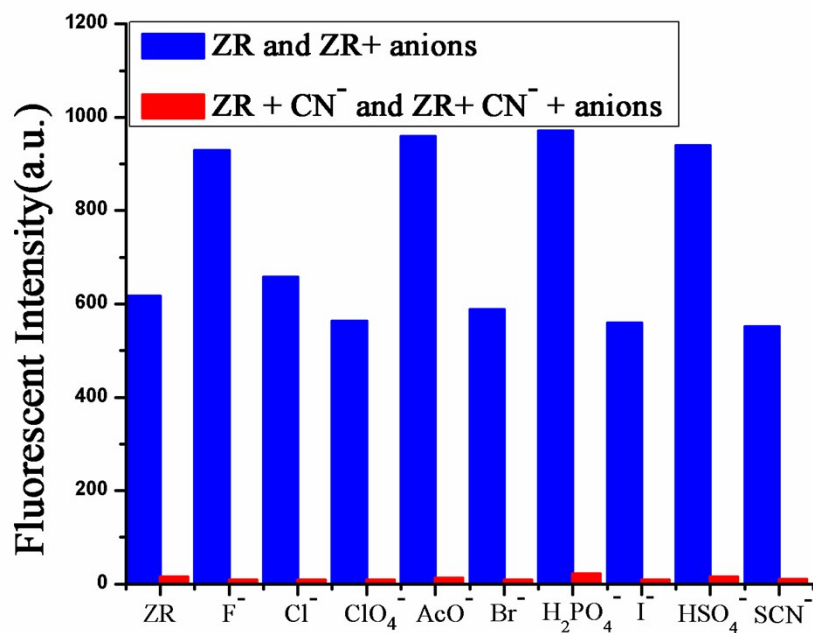

**Fig. S4** Fluorescent intensity of the competition experiments between  $\text{CN}^-$  and other anions in water ( $\lambda_{\text{ex}}=370$  nm).

## 6. A plot of fluorescence intensity Change of ZR with $\text{CN}^-$

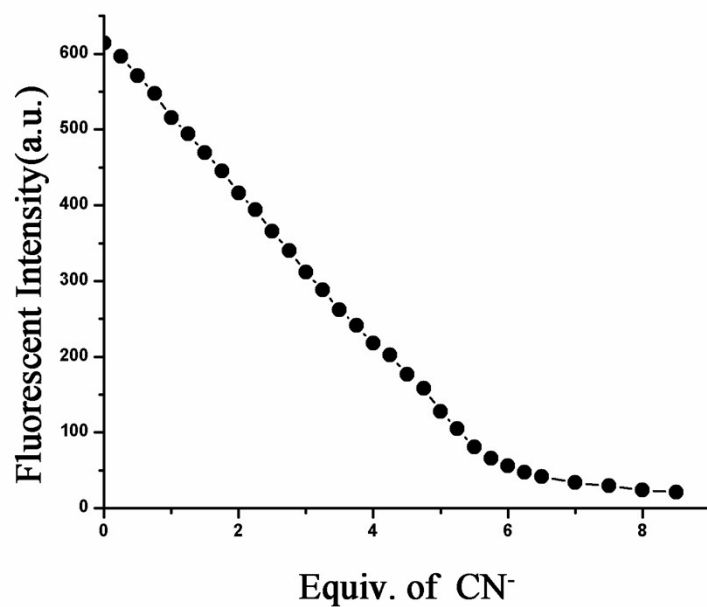

**Fig. S5** A plot of fluorescence intensity depending on the concentration of  $\text{CN}^-$  in the range from 0 to 8.5 equivalents.



## 7. Calculation of binding constant $K_a$

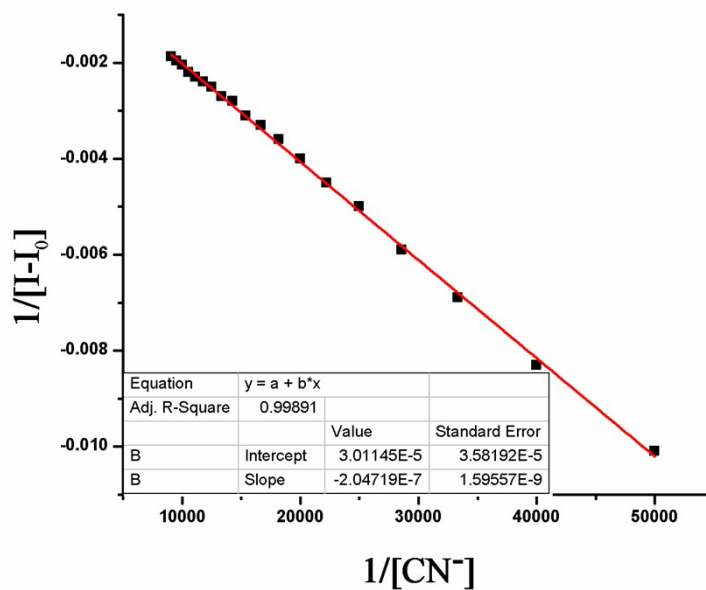

**Fig. S6** Benesi-Hilderbrand plot of **ZR** with  $\text{CN}^-$ .

Linear Equation:  $Y = -2.05 \times 10^{-7} \times X + 3.01 \times 10^{-5}$

$R^2 = 0.9989$

$1/[K_a(I_1 - I_0)] = -2.05 \times 10^{-7}$ ,  $(I_1 - I_0) = -590.6$

$K_a = 8.26 \times 10^3 \text{ M}^{-1}$

## 8. Determination of Detection Limit of $\text{CN}^-$

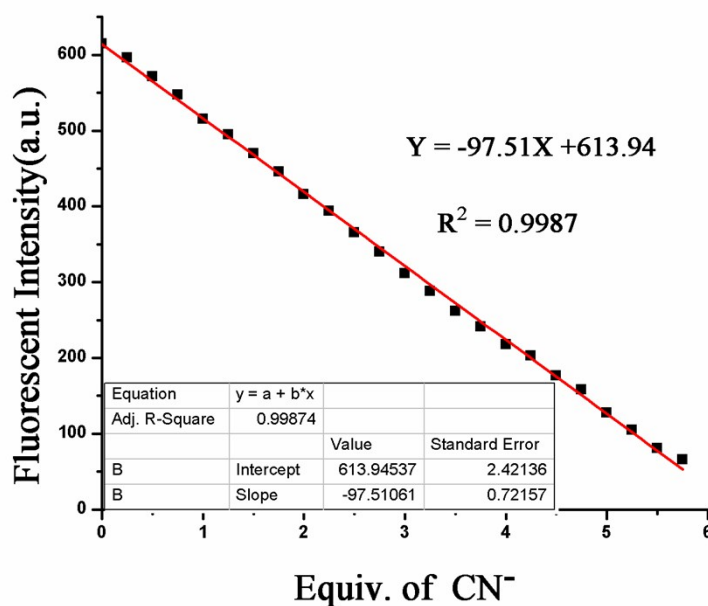

**Fig. S7** Plot of the intensity at 464 nm for a mixture of **ZR** and  $\text{CN}^-$  in water solution in the range 0–5.75 equiv. ( $\lambda_{\text{ex}} = 370 \text{ nm}$ ).

Linear Equation:  $Y = -97.51 \times X + 613.94$ ,  $R^2 = 0.9987$

$$\delta = \sqrt{\frac{\sum(F_0 - F_1)^2}{N-1}} = 0.435 \text{ (N=10)}$$

$$S = 9.751 \times 10^7, K = 3$$

$$\text{LOD} = K \times \delta / S$$

$$\text{LOD} = 1.34 \times 10^{-8} \text{ M}$$

$F_0$  is the fluorescence intensity of **ZR**;  $F_1$  is the average of the  $F_0$ .

## 9. Influence of pH on ZR

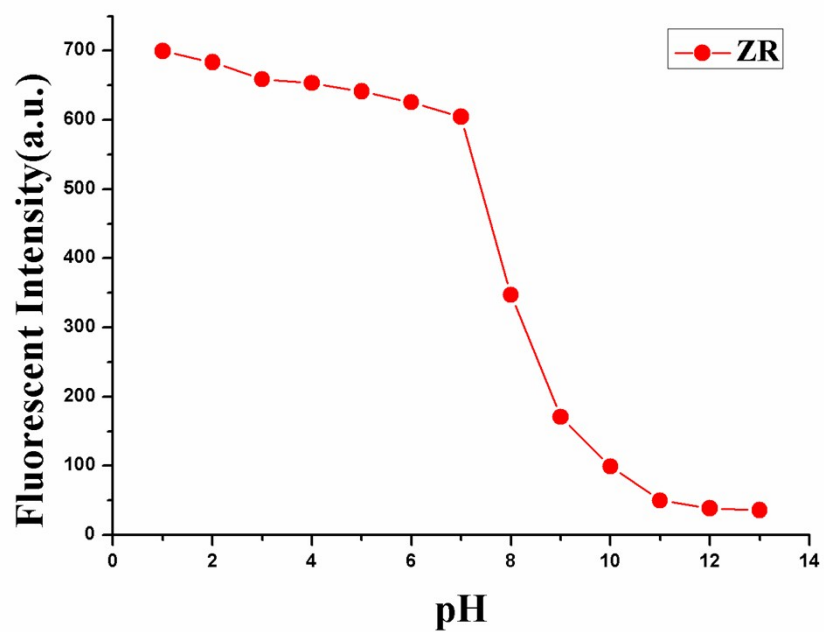

Fig. S8 Influence of pH on the fluorescence of ZR

## 10. The Fluorescence Intensity Changes of ZR in the Presence of $\text{CN}^-$ and $\text{Cr}^{3+}$

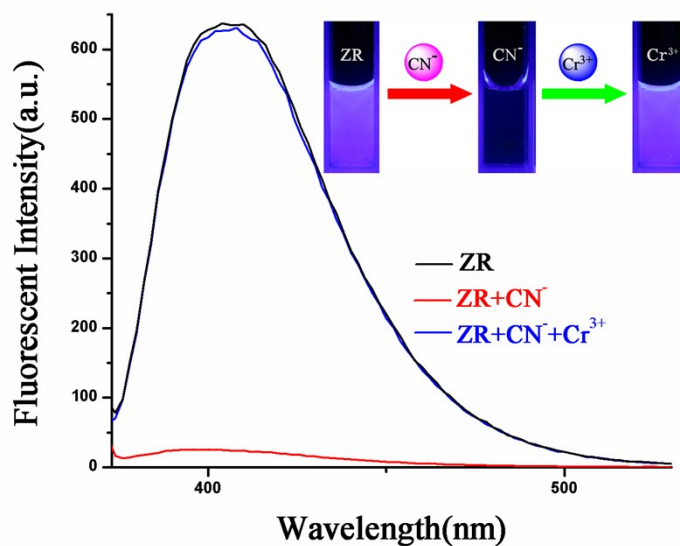

**Fig. S9** Fluorescence emission spectra of **ZR** (20 μM) in the presence of  $\text{CN}^-$  (8.5 equiv.) or  $\text{Cr}^{3+}$  (2.5 equiv.) in water ( $\lambda_{\text{ex}}=370$  nm). Inset: photograph from left to right shows the change in the fluorescence of only **ZR**, **ZR+CN<sup>-</sup>** and **ZR+CN<sup>-</sup>+Cr<sup>3+</sup>** in water on excitation at 365 nm.

## 11. Time-dependent Fluorescence Change of ZR with $\text{CN}^-$

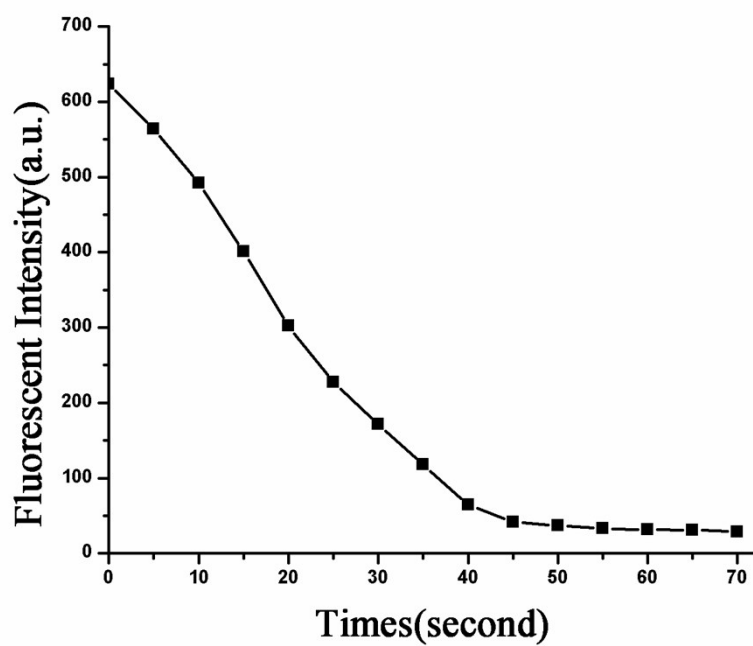

**Fig. S10** Time-dependent fluorescence change of **ZR** ( $20 \mu\text{M}$ ) in the presence of 12.5 equiv. of  $\text{CN}^-$  in water.

## 12. $^1\text{H}$ NMR spectra of ZR with addition of acid

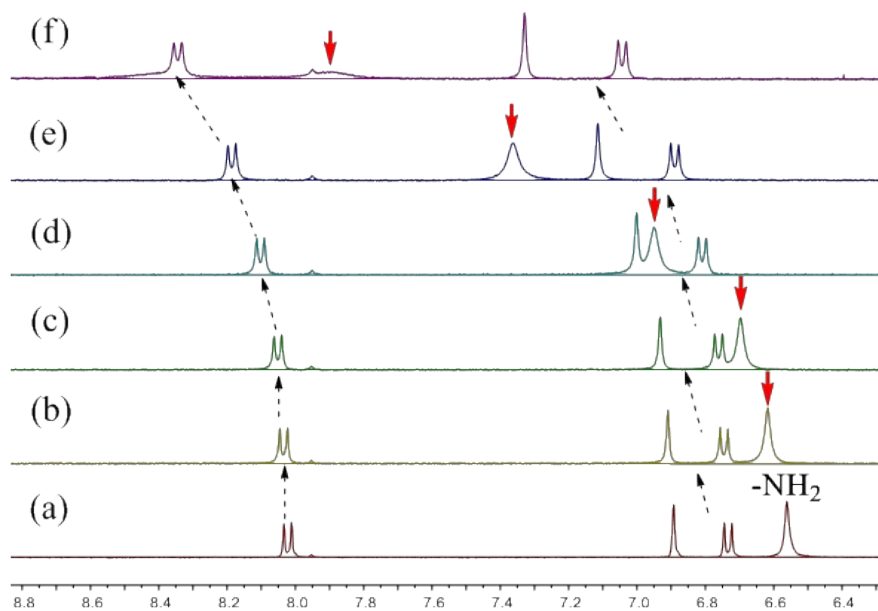

**Fig. S11** Partial  $^1\text{H}$  NMR spectra of: (a) **ZR**, (b) acid (0.1 equiv.), (c) acid (0.2 equiv.), (d) acid (0.5 equiv.), (e) acid (1.0 equiv.), (f) acid (2.0 equiv.) in  $\text{DMSO-d}_6$ .

### 13. IR spectra of compound ZR and ZR+CN<sup>-</sup>

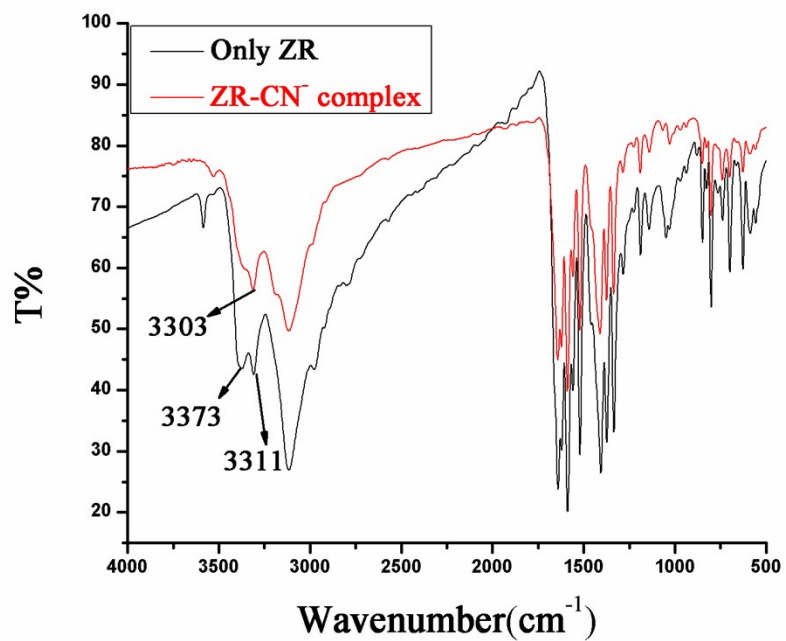

**Fig. S12** IR spectra of compound ZR and ZR+CN<sup>-</sup> complex in KBr disks.

## 14. ESI-MS spectrum of ZR

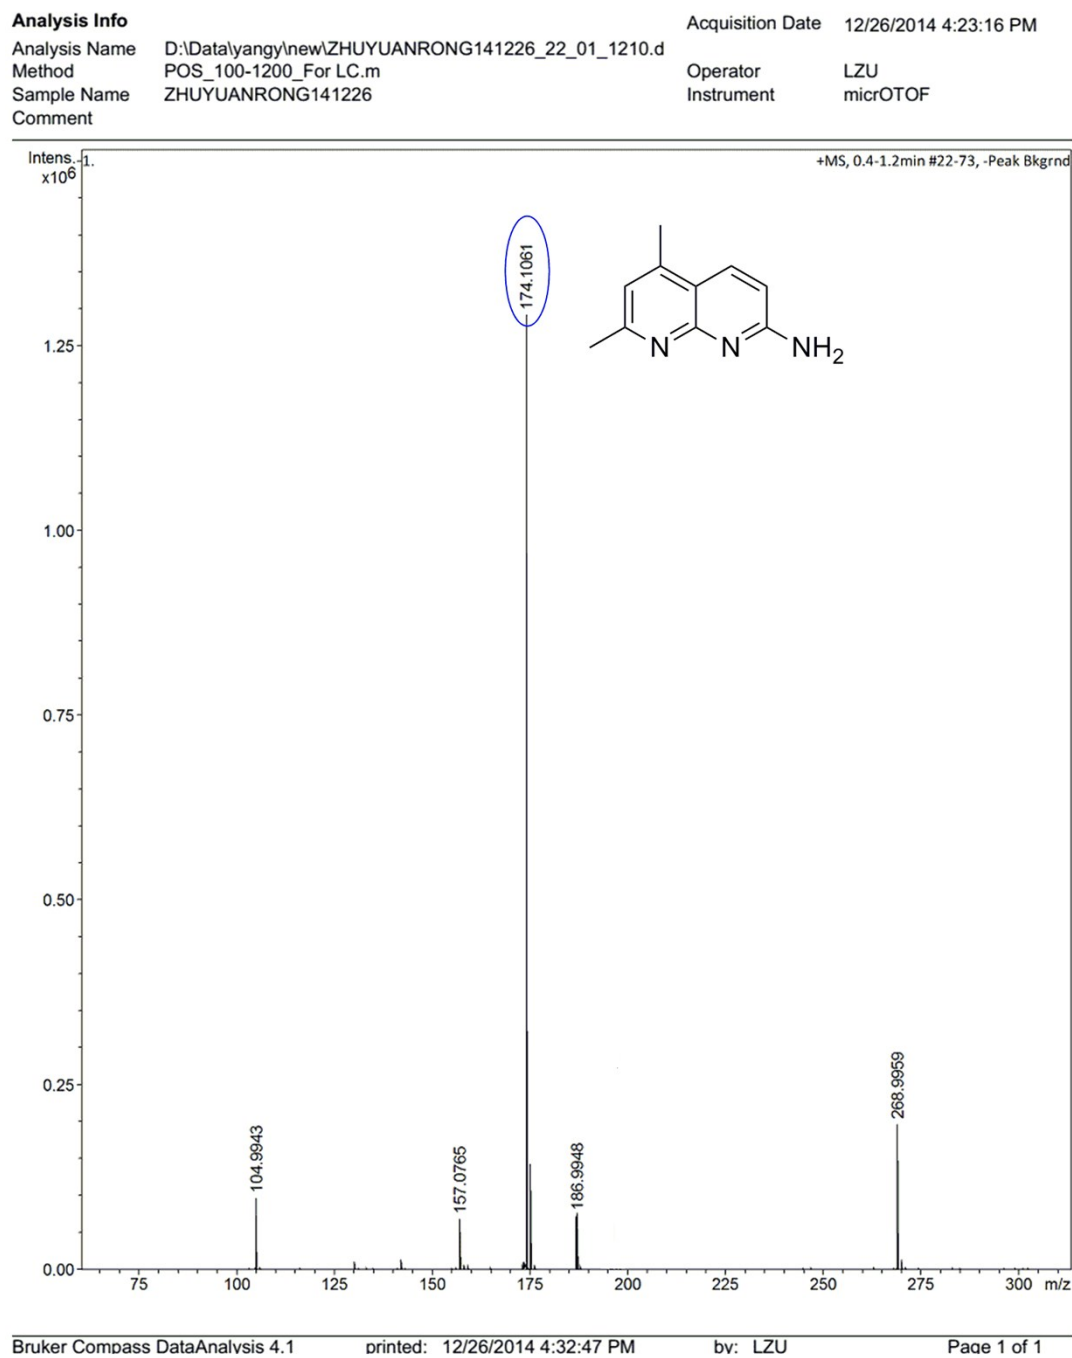

**Fig. S13** ESI-MS spectrum of ZR.



## 15. ESI-MS spectrum of ZR+CN<sup>-</sup> complex

### Generic Display Report

#### Analysis Info

Analysis Name D:\Data\YANGY\new\ZHUYUANRONG150407.d  
Method POS\_100-1000.m  
Sample Name  
Comment

Acquisition Date 4/7/2015 3:41:42 PM

Operator LZU  
Instrument micrOTOF

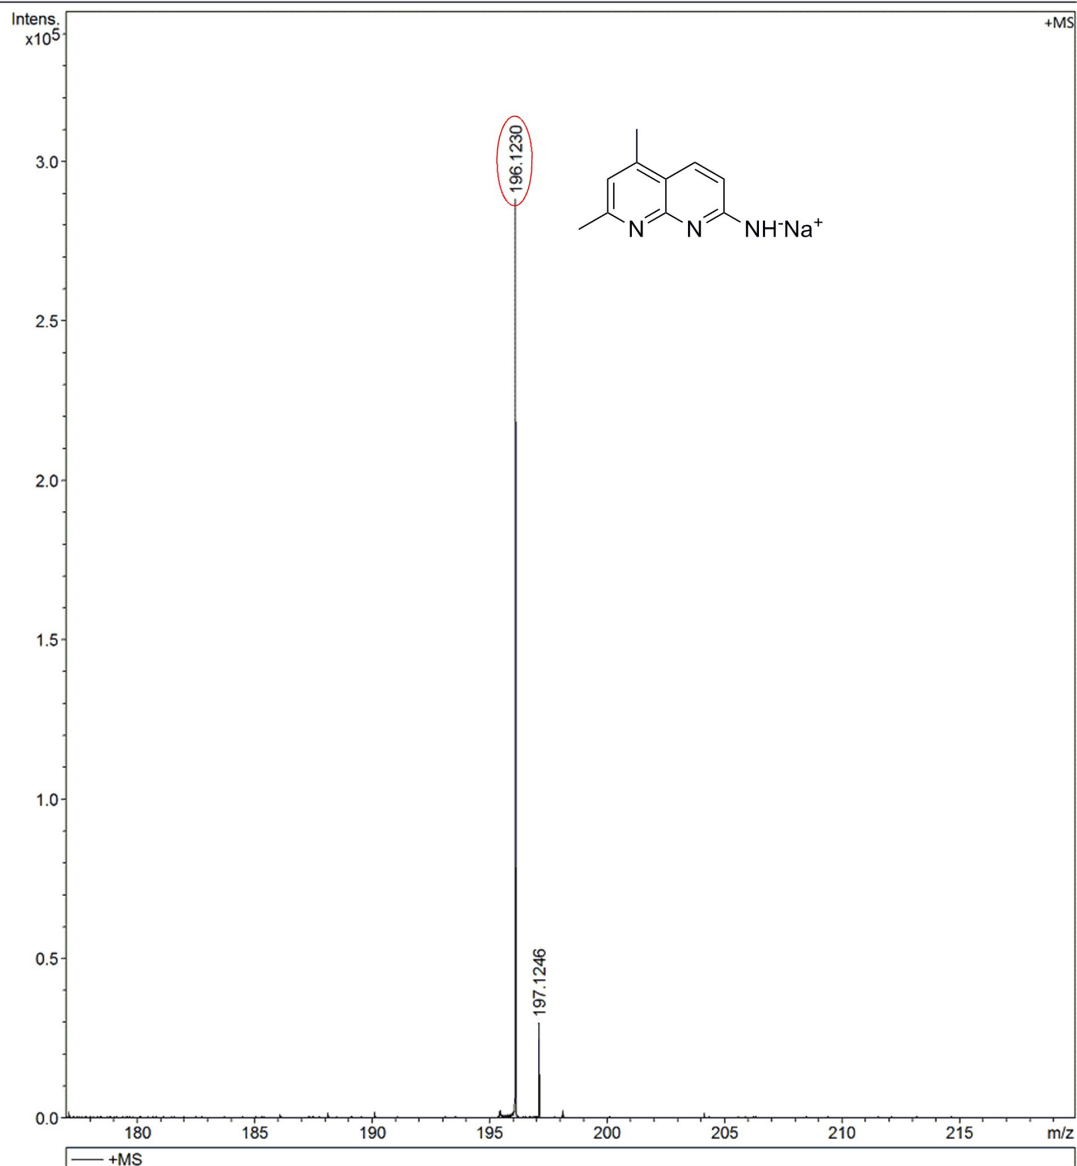

**Fig. S14** ESI-MS spectrum of ZR+CN<sup>-</sup> complex.

## 16. A complementary IMP logic function

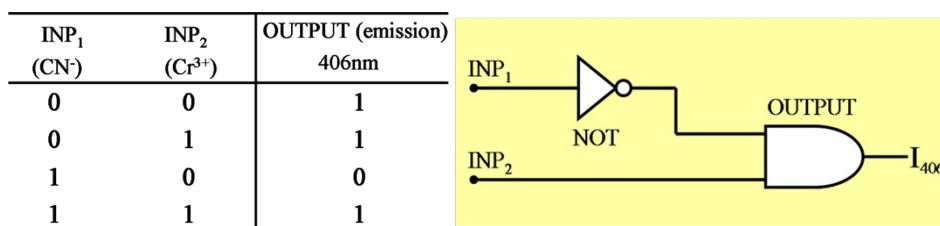

**Fig. S15** The complementary IMP logic gate and its truth table. INP1 and INP2 represent input CN<sup>-</sup> and input Cr<sup>3+</sup>, respectively.

## 17. Performance of ZR in the IMP gate mode

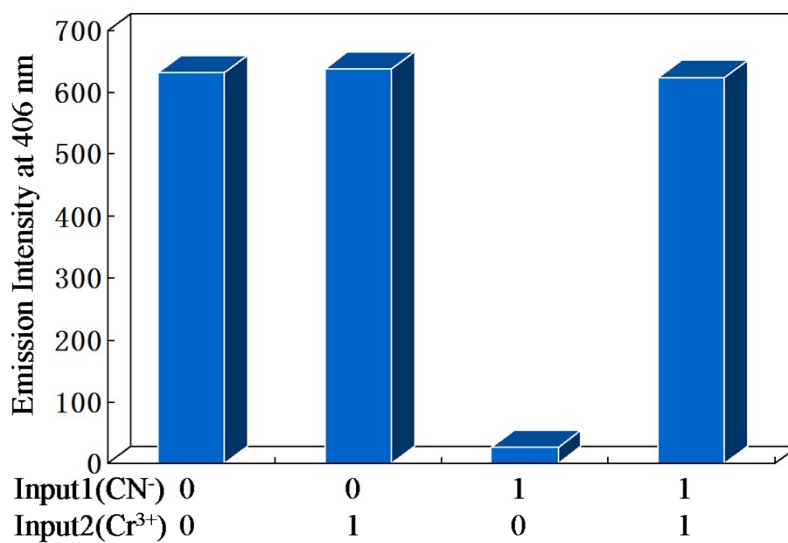

**Fig. S16** Performance of **ZR** in the IMP gate mode. The bars show the emission intensity at 406 nm after each input combination in water ( $\lambda_{\text{ex}}=370$  nm).
